# Supplementary material for: miR-965 controls cell proliferation and migration during tissue morphogenesis in the Drosophila abdomen
Source: eLife journal article supplement (doi:10.7554/elife.07389), 2015-07-30

Figure 5-figure supplement 4

Rescue of the migration defect of *miR-965* mutants with reduced levels of *string*

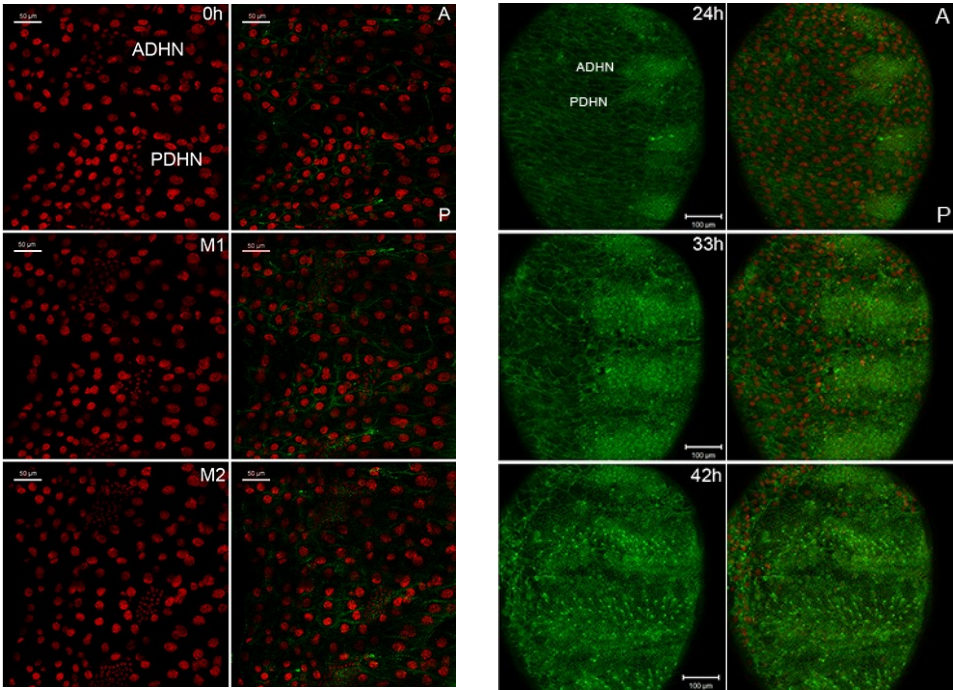

Supplement: supp [file elife-07389-supp-v1.zip]
