# Supplementary material for: miR-965 controls cell proliferation and migration during tissue morphogenesis in the Drosophila abdomen
Source: eLife journal article supplement (doi:10.7554/elife.07389), 2015-07-30

Figure 5-figure supplement 3

Speed of histoblast nest migration  
3<sup>rd</sup> segment

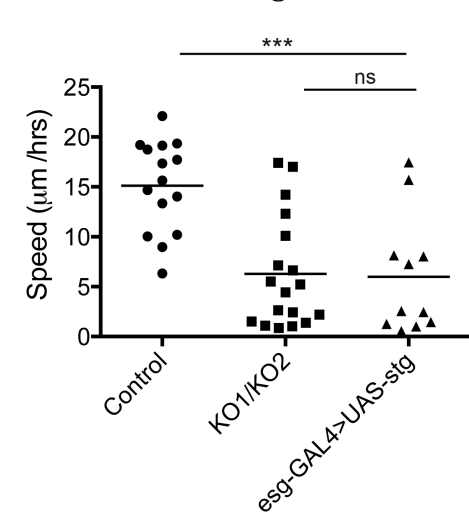

4<sup>th</sup> segment

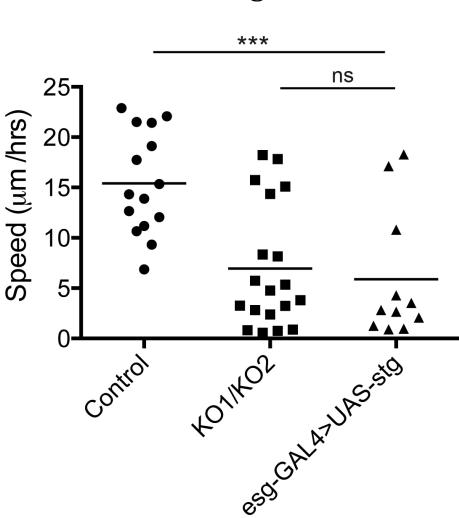

Supplement: supp [file elife-07389-supp-v1.zip]
