# Supplementary material for: miR-965 controls cell proliferation and migration during tissue morphogenesis in the Drosophila abdomen
Source: eLife journal article supplement (doi:10.7554/elife.07389), 2015-07-30
Supplement: supp [file elife-07389-supp-v1.zip]

Figure 4-figure supplement 1

```
position 1
target 5' U   A UU           AAACUUU           3'
          AAG G   GAAAGUUGU           ACGCUUA
          UUC C   UUUUCGAUA           UGCGAAU
miRNA  3'           CC                       5'
```

|                       | <u>Seed 2</u>                                | <u>Seed 1</u>            |
|-----------------------|----------------------------------------------|--------------------------|
| mutated stg 3'UTR -   | CCGACATTACGCCTAAGTGATGCCAGATGTACCCTATATGATCA |                          |
| wild type stg 3'UTR - | AAGATCTATCGTTTAAGAGTTGAAAGTTGTAAACTTTACGCTTA |                          |
| 5'stg 3'UTR           | CUAU CGUUUA                                  | 5'stg 3'UTR.....UACGCUUA |
|                       |                                              |                          |
| 3' mir-965            | GAUA GCGAAU                                  | 3' mir-965....AUGCGAAU   |
|                       | U                                            |                          |
