# Supplementary figures and images for: miR-965 controls cell proliferation and migration during tissue morphogenesis in the Drosophila abdomen
Source: eLife journal article supplement (doi:10.7554/elife.07389), 2015-07-30

Figure 1-figure supplement 3

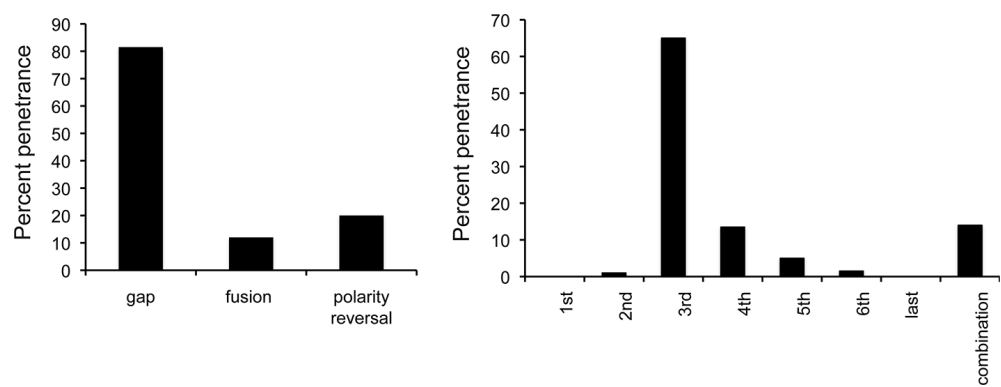

Supplement: supp [file elife-07389-supp-v1.zip]

Figure 6-figure supplement 1

Mature *miR-965* miRNA regulation by EcR

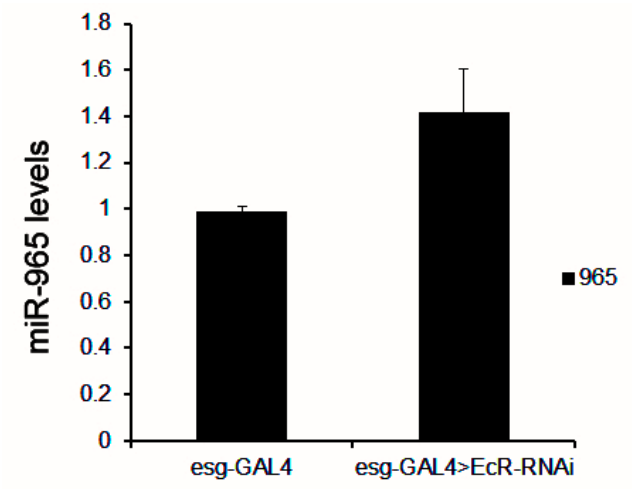

Supplement: supp [file elife-07389-supp-v1.zip]

Figure 5-figure supplement 5

Speed of histoblast migration restored by reduced *string* activity

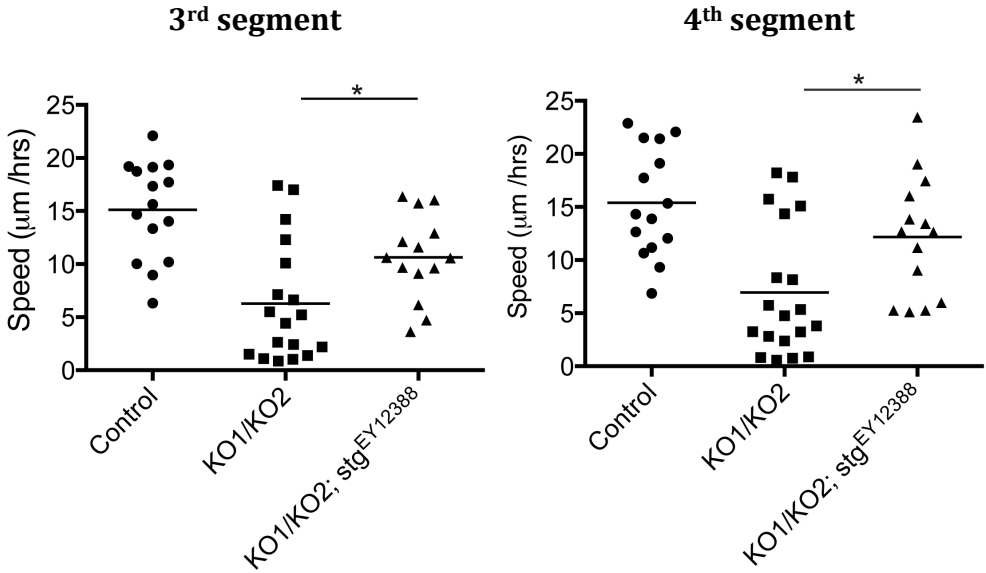

Supplement: supp [file elife-07389-supp-v1.zip]

Figure 3-figure supplement 1

Rate of histoblast migration

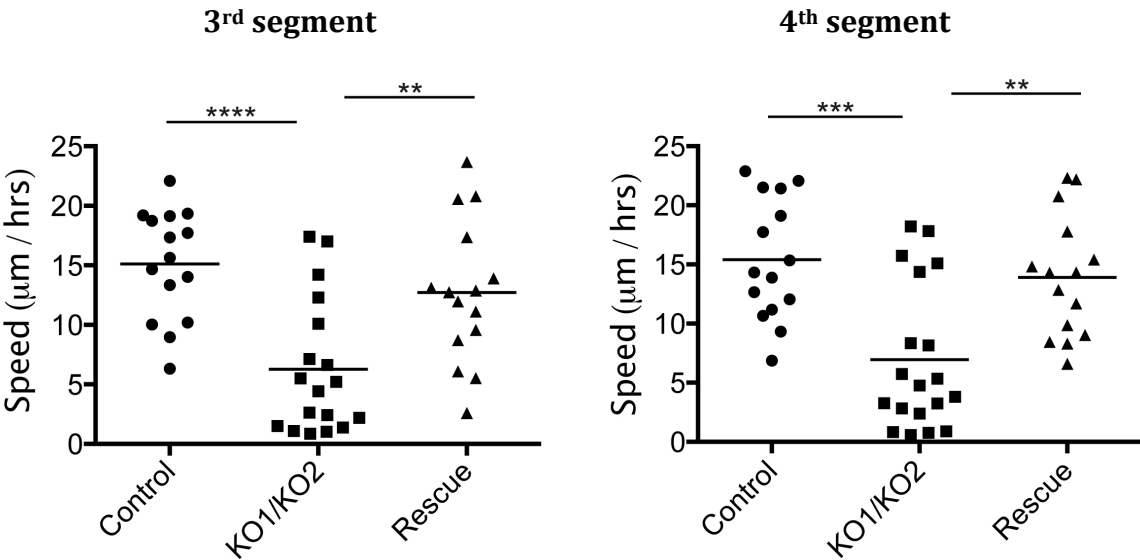

Supplement: supp [file elife-07389-supp-v1.zip]

**Figure 1-figure supplement 1**

Evidence that *kismet* and *miR-965* arise from a common transcription unit

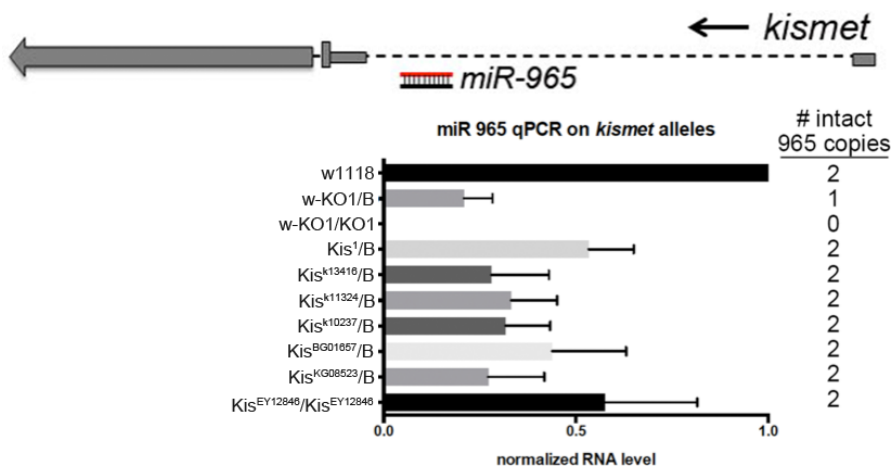

Supplement: supp [file elife-07389-supp-v1.zip]

## Figure 1-figure supplement 2

### Phenotype classification

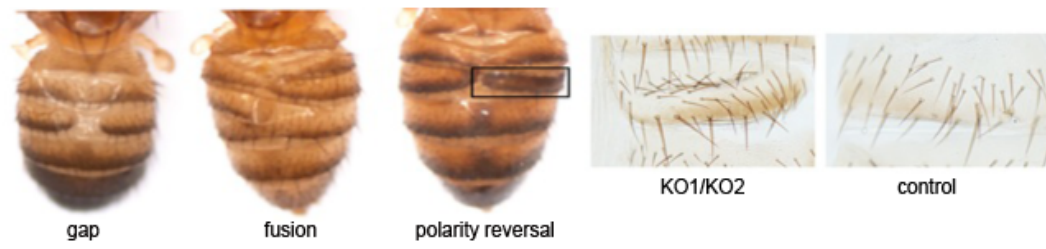

Supplement: supp [file elife-07389-supp-v1.zip]

Figure 3-figure supplement 2

Large polyploid cells in *miR-965* mutant histoblast nests

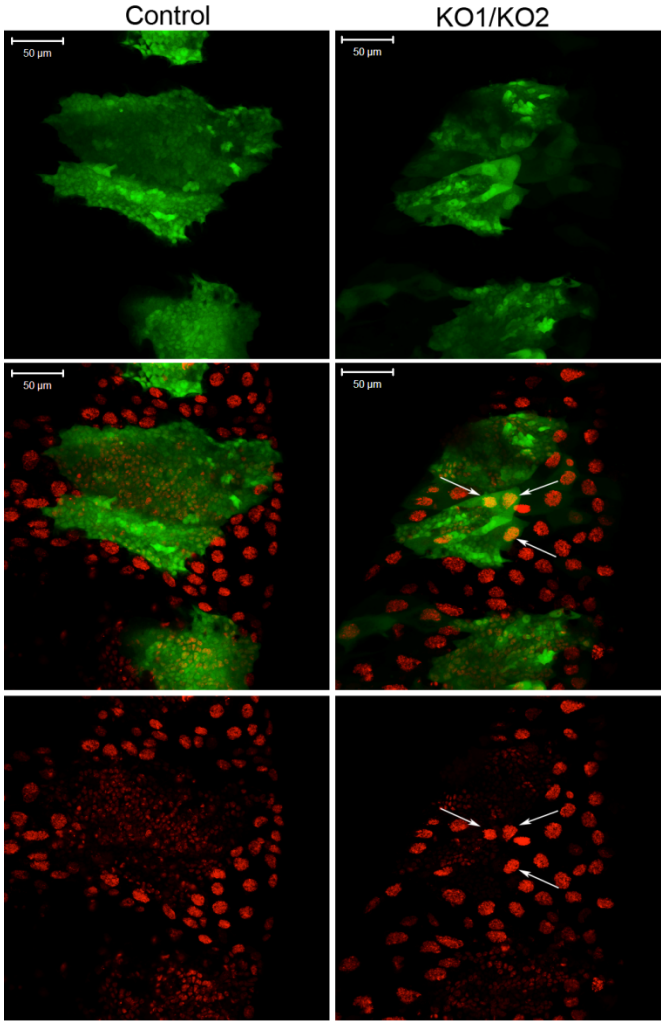

Supplement: supp [file elife-07389-supp-v1.zip]

Figure 6-figure supplement 2

EcR 3' UTR reporter expression in the *miR-965* mutant

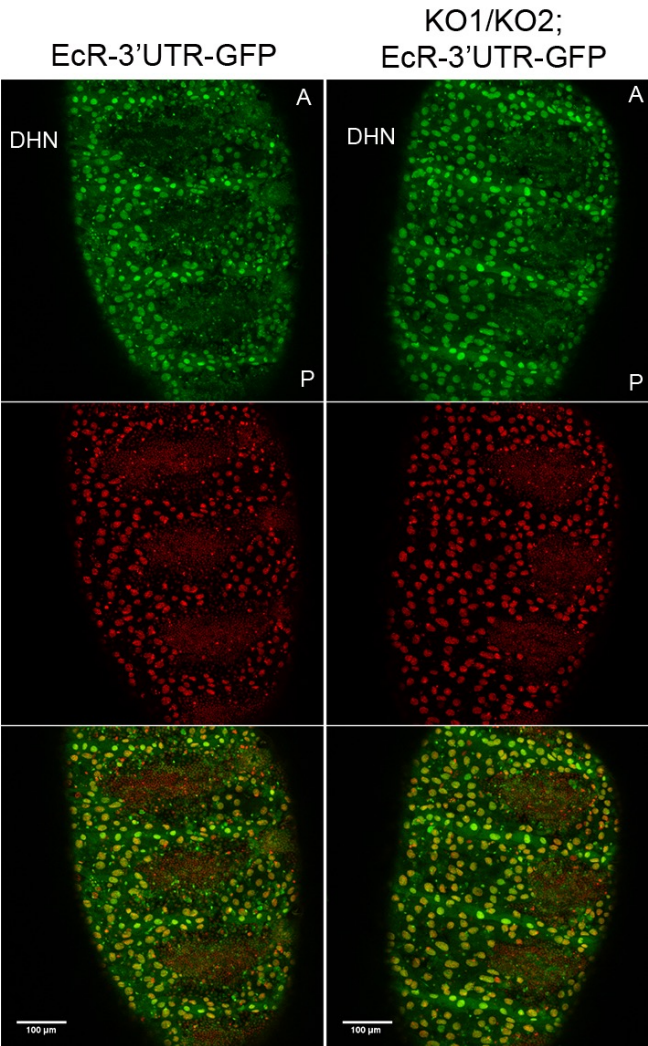

Supplement: supp [file elife-07389-supp-v1.zip]

Figure 3-figure supplement 3

Pupal survival assays

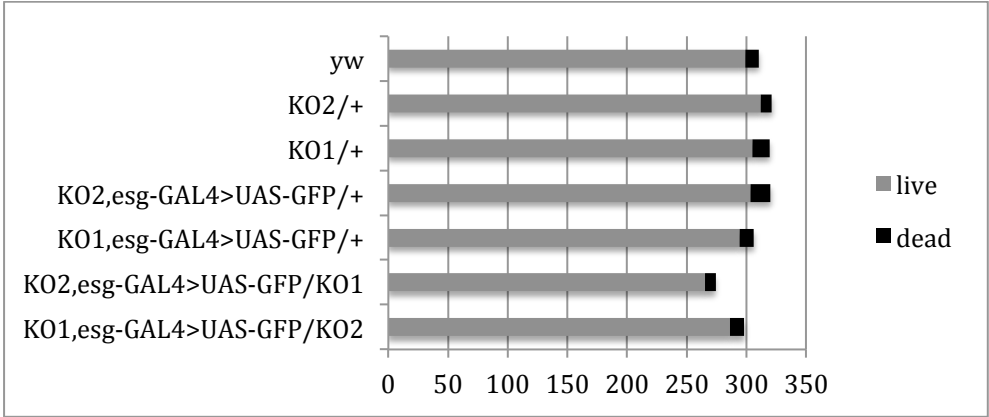

Supplement: supp [file elife-07389-supp-v1.zip]
